# Supplementary material for: Oxygen deficient yolk–shell structured Co3O4 microspheres as an oxygen evolution reaction electrocatalyst for anion exchange membrane water electrolyzers
Source: Royal Society of Chemistry journal article supplement (doi:10.1039/d3ta02710d), 2023-01-01
Supplement: d3ta02710d1.pdf [file d3ta02710d1.pdf]

## Supplementary Information

# Oxygen deficient yolk–shell structured $\text{Co}_3\text{O}_4$ microspheres as an oxygen evolution reaction electrocatalyst for anion exchange membrane water electrolyzers

In Tae Kim<sup>a,‡</sup>, Sang-Hyun Kim<sup>a,‡</sup>, Jun Seok Ha<sup>a</sup>, Tae Ha Kim<sup>a</sup>, Jungho Cho<sup>b</sup>, Gi Dae Park<sup>a,\*</sup>, and Yoo Sei Park<sup>a\*</sup>

### AUTHOR ADDRESS.

<sup>a</sup> Department of Advanced Material Engineering, Chungbuk National University, Chungdae-ro 1, Seowon-Gu, Cheongju, Chungbuk, 28644, Republic of Korea.

<sup>b</sup> Department of Mechanical Engineering, Chungbuk National University, Chungdae-ro 1, Seowon-Gu, Cheongju, Chungbuk, 28644, Republic of Korea.

<sup>‡</sup> These authors contributed equally: In Tae Kim and Sang-Hyun Kim

\*E-mail: [gdpark@chungbuk.ac.kr](mailto:gdpark@chungbuk.ac.kr), [yspark@chungbuk.ac.kr](mailto:yspark@chungbuk.ac.kr)

KEYWORDS: anion exchange membrane water electrolysis; electrocatalysts; spray pyrolysis; oxygen evolution reaction; yolk-shell

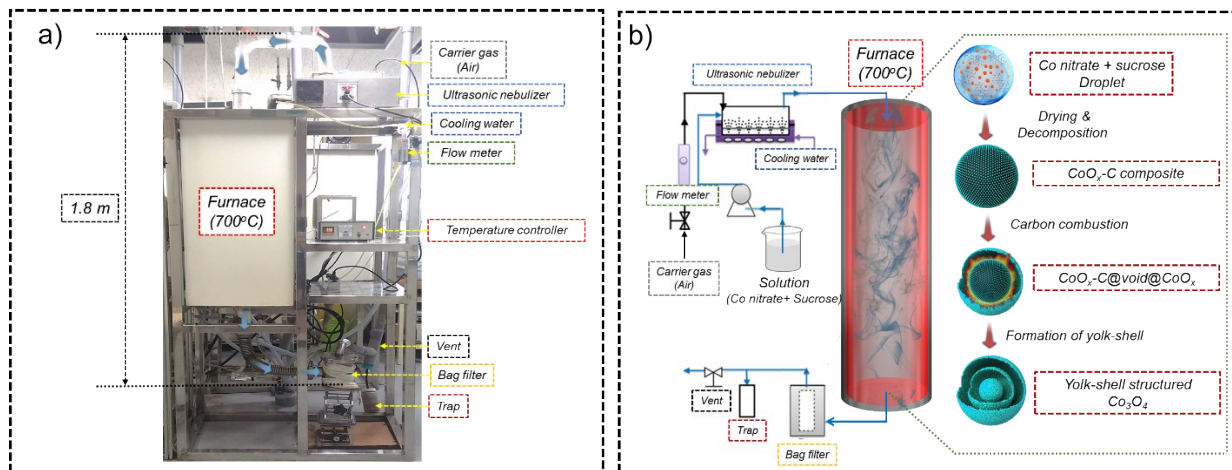

**Figure S1.** (a) Digital photo and (b) schematic diagram of the spray pyrolysis system for the yolk-shell structured  $\text{Co}_3\text{O}_4$  powders.

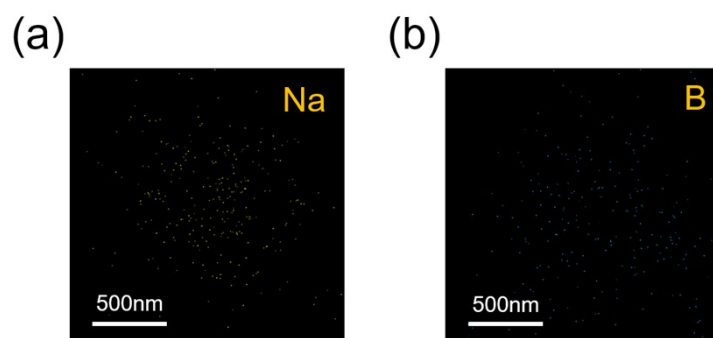

**Figure S2.** Elemental mapping images of oxygen deficient yolk-shell structured  $\text{Co}_3\text{O}_4$  microsphere (R- $\text{Co}_3\text{O}_4$ -YS): (a) Na (b) B.

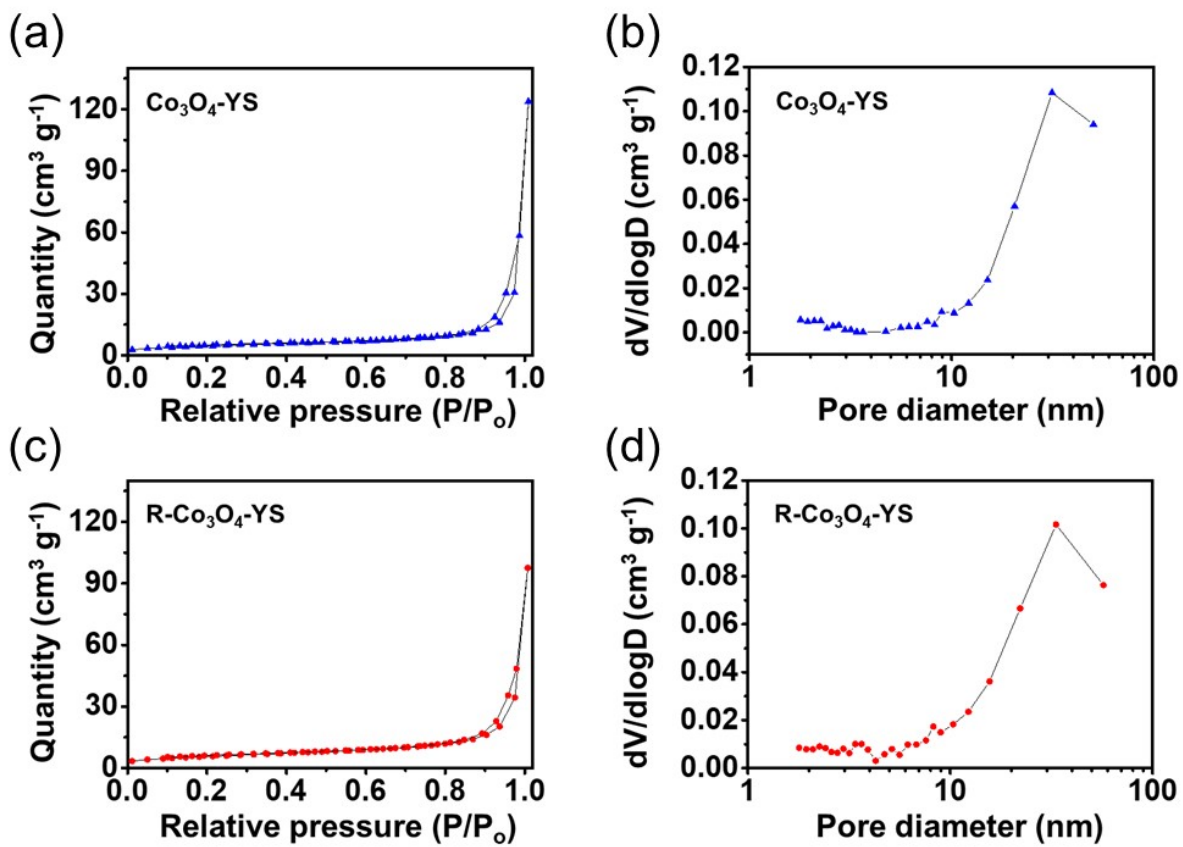

Figure S3. Brunauer-Emmett-Teller (BET) of (a,b)  $\text{Co}_3\text{O}_4\text{-YS}$  and (c,d)  $\text{R-Co}_3\text{O}_4\text{-YS}$ .

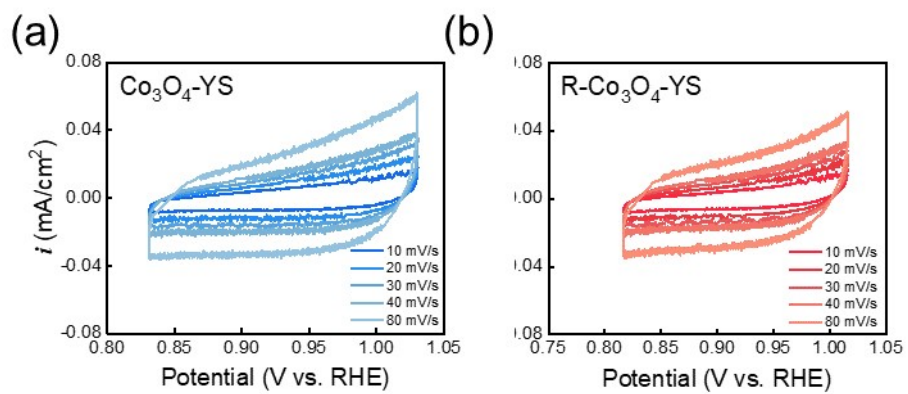

**Figure S4.** Cyclic voltammetry of (a) Co<sub>3</sub>O<sub>4</sub>-YS and (b) R-Co<sub>3</sub>O<sub>4</sub>-YS in non-faradaic region with different scan rates.

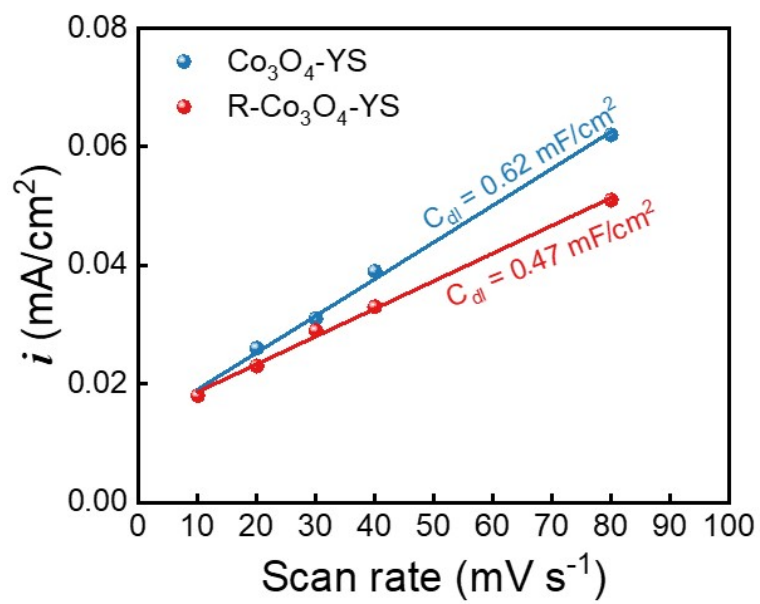

**Figure S5.** Double layer capacitance ( $C_{dl}$ ) of  $\text{Co}_3\text{O}_4\text{-YS}$  and  $\text{R-Co}_3\text{O}_4\text{-YS}$ .

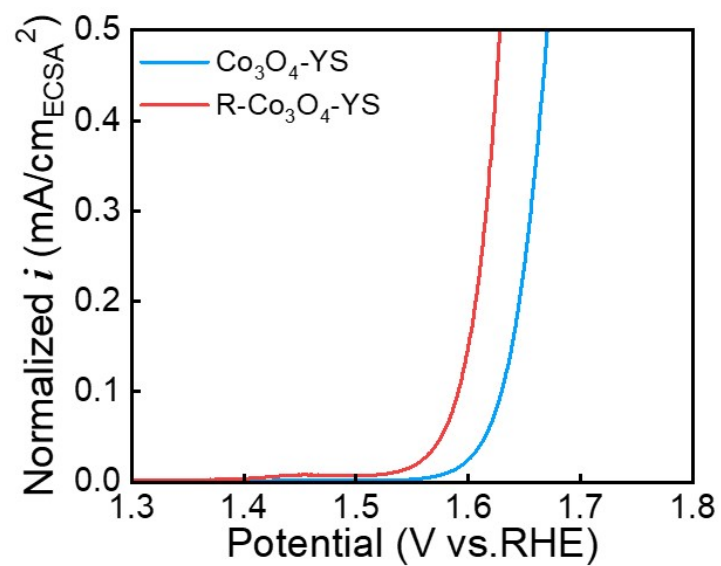

**Figure S6.** Polarization curves of  $\text{Co}_3\text{O}_4\text{-YS}$  and  $\text{R-Co}_3\text{O}_4\text{-YS}$  normalized by ECSA.

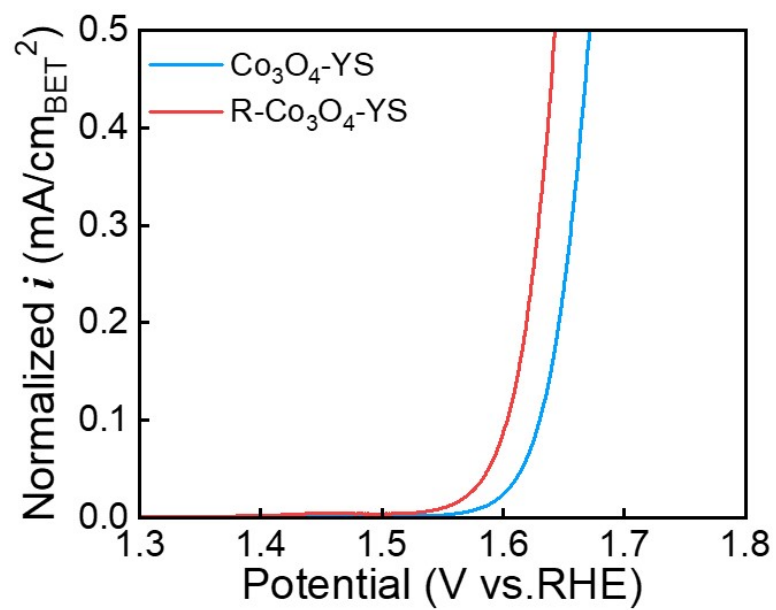

**Figure S7.** Polarization curves of  $\text{Co}_3\text{O}_4\text{-YS}$  and  $\text{R-Co}_3\text{O}_4\text{-YS}$  normalized by BET.



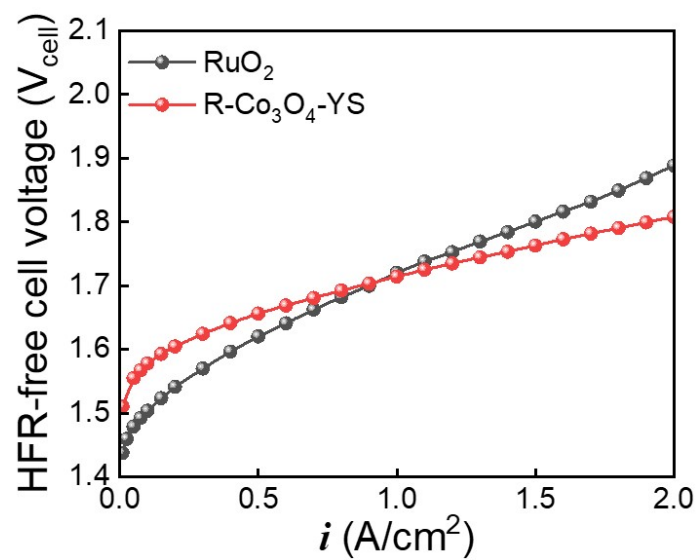

**Figure S8.** HFR-free polarization curves of AEMWE equipped with RuO<sub>2</sub> and R-Co<sub>3</sub>O<sub>4</sub>-YS.

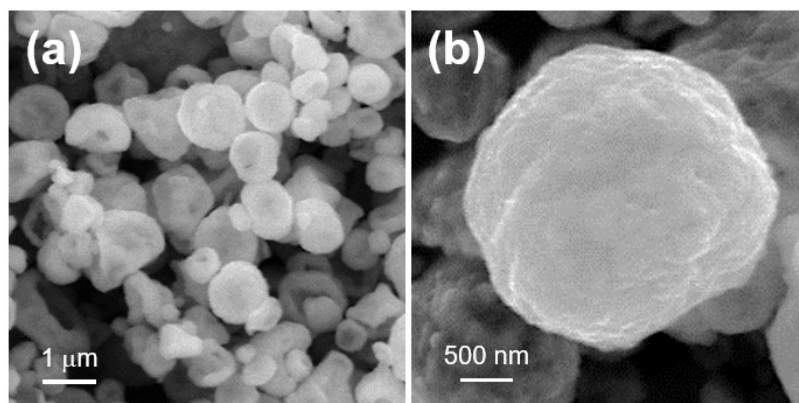

**Figure S9.** SEM images of non-yolk-shell  $\text{Co}_3\text{O}_4$  microsphere ( $\text{Co}_3\text{O}_4$ -dense).

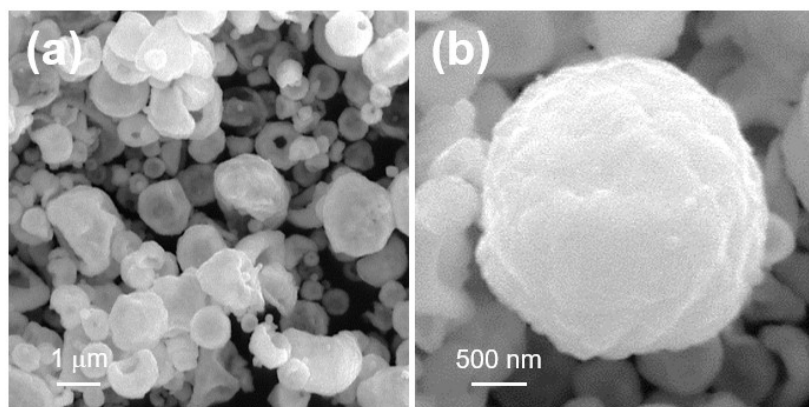

**Figure S10.** SEM images of oxygen deficient non-yolk-shell  $\text{Co}_3\text{O}_4$  microsphere (R- $\text{Co}_3\text{O}_4$ -dense).

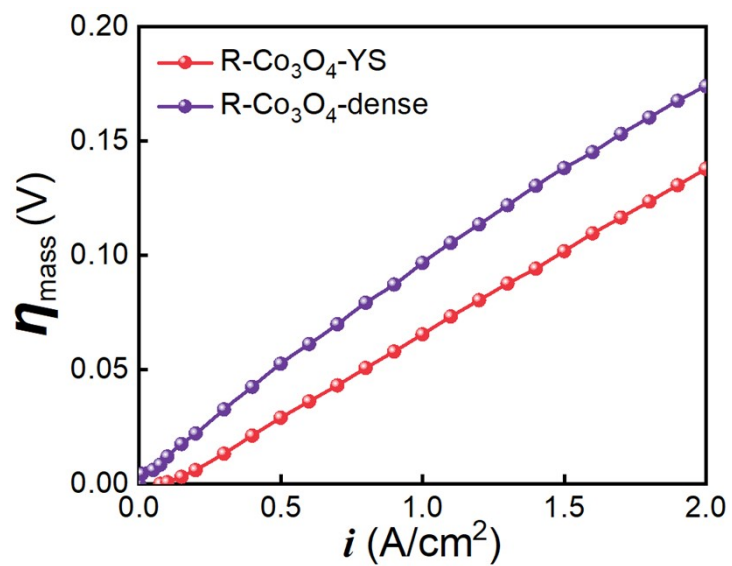

**Figure S11.** Mass transport losses of AEMWE equipped with R-Co<sub>3</sub>O<sub>4</sub>-YS and R-Co<sub>3</sub>O<sub>4</sub>-dense.

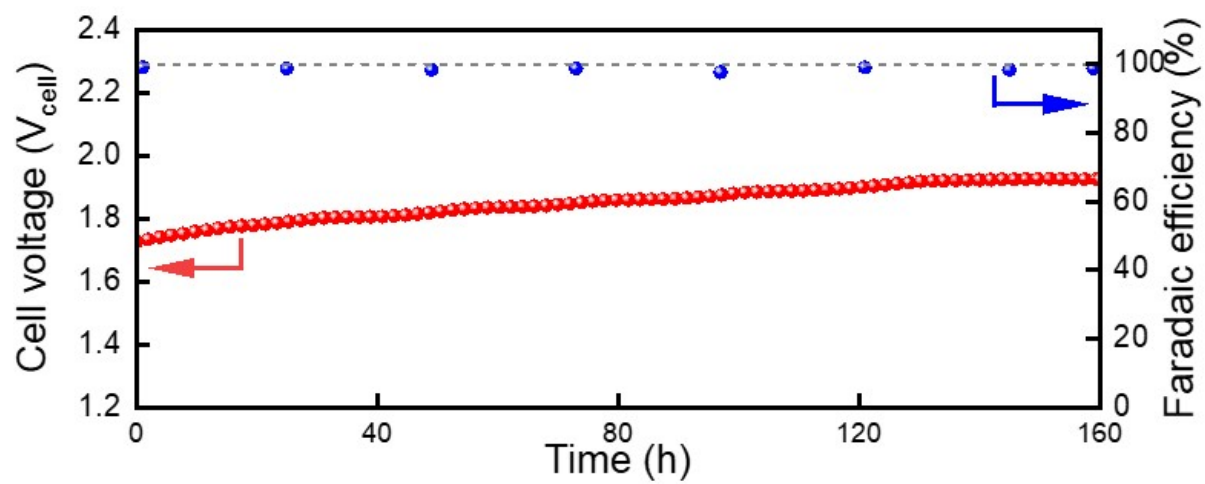

**Figure S12.** Durability of AEMWE equipped with R-Co<sub>3</sub>O<sub>4</sub>-YS at 0.5 A/cm<sup>2</sup>.

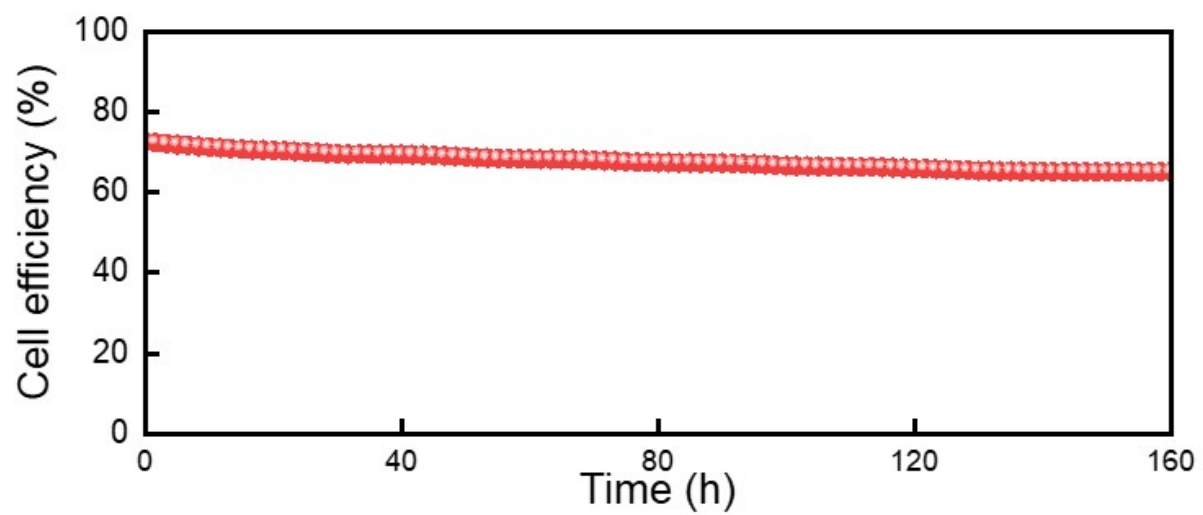

**Figure S13.** Cell efficiency of AEMWE equipped with R-Co<sub>3</sub>O<sub>4</sub>-YS at 0.5 A/cm<sup>2</sup>.
